# Supplementary material
Source: MDPI journal article supplement (https://www.mdpi.com/2073-4441/13/22/3310)

## Supplementary Materials

|                                                                                           |    |
|-------------------------------------------------------------------------------------------|----|
| File S1. Sampling protocol, quality assurance, data and R code for the Beta SDAM AW ..... | 2  |
| File S2. Determination of streamflow duration classes from hydrologic data .....          | 3  |
| File S3. Indicator metrics evaluated in the development of the beta SDAM AW.....          | 6  |
| File S4. Performance evaluation measures for all models across each sub-region.....       | 21 |
| File S5. Focus-area studies .....                                                         | 29 |

File S1. Sampling protocol, quality assurance, data and R code for the Beta SDAM AW

The protocol may be downloaded here:

[https://ftp.sccwrp.org/pub/download/PROJECTS/Attachment%201\\_Flow%20Duration%20Protocol\\_version2.zip](https://ftp.sccwrp.org/pub/download/PROJECTS/Attachment%201_Flow%20Duration%20Protocol_version2.zip)

The quality assurance project plan may be downloaded here:

[https://ftp.sccwrp.org/pub/download/SDAM/SDAM\\_for\\_Arid\\_SW\\_QAPP\\_version\\_2.0\\_Final\\_wattach\\_nsignatures.pdf](https://ftp.sccwrp.org/pub/download/SDAM/SDAM_for_Arid_SW_QAPP_version_2.0_Final_wattach_nsignatures.pdf)

Data and R code used in analysis may be accessed here (doi:10.23719/1523371):

[https://ftp.sccwrp.org/pub/download/PROJECTS/asw\\_fdam\\_FinalDataAndCode\\_Final.zip](https://ftp.sccwrp.org/pub/download/PROJECTS/asw_fdam_FinalDataAndCode_Final.zip)

## File S2. Determination of streamflow duration classes from hydrologic data

Multiple hydrologic data sources were evaluated in order to classify candidate study reaches. Reaches were considered “acceptable” for the study if they had one source of hydrologic information, and “preferred” if they had two or more sources that provided consistent information. Reaches that had multiple conflicting sources that could not be reconciled were excluded from consideration. The sources of hydrologic data included:

*Long-term continuous records*, namely, data from the USGS stream gage network. USGS gage reaches were classified based on mean daily discharge at USGS gaging station within the AW region. Daily discharge data from gages within the ASW region active from 1959 to 2019 were downloaded with the *dataRetrieval* package in R [130]. Gages were considered for inclusion in the study if they had at least three years of continuous data and had a value for mean daily discharge for at least 99% of days over the period of record. Gages with more recent observations were prioritized for reach selection over older gage records, but due to the limited number of non-perennial gages with continuous and complete records older gages were considered and included in the study. The number of days within each water year with mean daily discharge equal to zero was used to calculate the percent of zero-flow days for period of record. Gages with <5% of the period of record with zero-flow days were considered perennial and the remainder of gages were considered non-perennial. The hydrograph for each non-perennial gage was then plotted and visually inspected. If discharge was greater than zero for several continuous days and the reach appeared to flow only in response to precipitation it was classified as ephemeral. If the reach was neither perennial nor ephemeral, it was classified as intermittent.

If it was unclear if gages were flowing only in response to precipitation, the *rnoaa* package [131] was used to download precipitation data from weather stations within 100 km of USGS gage locations. Then, cumulative precipitation within a water year was then plotted alongside discharge hydrographs. If a non-perennial gage appeared to be possibly perennial, or if a classification between intermittent and ephemeral was difficult to discern, the gage was flagged for review by the RSC. For example, if a reach showed different patterns in recent versus historical patterns, the hydrograph was flagged for RSC review. The RSC were provided with several feedback options for flagged USGS gages. Reviewers could suggest a likely classification, identify additional sources of information to confirm a classification, or recommend that a gage be excluded from the study because a definitive classification could not be determined. USGS stream gages were the primary source for perennial streams in the region.

Because the USGS stream gage network included few non-perennial streams, and because we preferred to have multiple sources of information whenever possible, we evaluated these additional sources of hydrologic data:

*Short-term continuous records*, such as data loggers (such as the STIC loggers mentioned above, or pressure transducers) and wildlife cameras deployed under other studies. Water presence data from these sources were plotted and visually inspected. Streams were classified as perennial if records indicated continuous flow in most years; as intermittent if extended dry periods were evident in most years; or as ephemeral if wet periods were typically lasted fewer than a few days.

*Discontinuous records*, such as field photos, aerial imagery, and field notes, were used to document the presence or absence of water during a reach-visit or a single point in time. Because of the sporadic nature of this data type, these data were only used to classify streams as intermittent in cases where

photos indicated the presence of surface water multiple weeks apart, as well as the absence of water in that same year. Field photographs and other discontinuous data sources were not used by themselves to classify streams as perennial or ephemeral, but could be used to corroborate classifications based on continuous records.

*Published studies.* Studies that identified intermittent or ephemeral stream-reaches were evaluated (e.g., [63,75,110]). Reaches were included if it was possible to align the class definitions above with the data or information presented in the report, and a precise location could be determined. In several cases, we contacted study authors to request raw data or obtain their judgments about their study reaches. For example, a previous study in the upper Colorado River basin used USGS gage data to classify streams as perennial, strongly intermittent and weakly intermittent and noted that strongly intermittent reaches likely included some ephemeral reaches [5]. We interviewed the lead author and asked her to identify reaches that she believed matched our definition of an ephemeral reach based on her knowledge of existing hydrologic data and previous reach visits to study reaches.

*Local expertise.* Streamflow classification was determined through interviews with experts familiar with the stream and specific reach hydrology. To qualify as an expert the person ideally had multiple years of familiarity with the reach and had visited it recently. We provided experts with our definitions of flow duration classes and asked them to classify streams based on direct observations of stream hydrology, e.g., the presence or absence of water, pools or flow and not based on inferences of the timing of streamflow for other streams in the area (e.g., seasonal snowmelt). Experts were also discouraged from considering indirect indicators of flow duration, such as the presence or absence of hydrophytes in the stream channel.

#### **Reclassification of reaches:**

When conditions during data collection appeared to be inconsistent with expectations (e.g., surface flow observed at ephemeral reaches despite the lack of recent rainfall), the data underlying the original classification was reviewed; local experts were consulted and re-interviewed whenever possible. If new information revealed that the original classification was incorrect, either a new classification was applied, or the reach was withheld from analysis (with RSC review and approval). A total of 5 reaches were re-evaluated, and all were reclassified from ephemeral to intermittent based on new information.

In three instances, the field crews sampled a reach close to but distinct from the intended location. In one of these instances, consultation with a local expert who knew the sampled location well provided us with information that allowed its subsequent classification. In the other instances, new information could not be found, and the reaches were excluded from analysis.

## File S3. Indicator metrics evaluated in the development of the beta SDAM AW

### File S3.1: Metric abbreviations, descriptions, and selection criteria

Metrics followed by an asterisk (\*) are hydrologic metrics considered direct measures of water presence. (NM) indicates metrics that are scored following the NM protocol [34]. C: Continuous metrics. O: Ordinal metrics. B: Binary metrics. % dom: Percent dominance of most common value. PvlvE-F: F-statistic from an analysis of variance comparing values at perennial, intermittent, and ephemeral reaches. EvAll-t: t-statistic from a comparison of values at ephemeral and at least intermittent reaches. PvNP-t: t-statistic from a comparison of values at perennial and non-perennial reaches. Pvlwet-t: t-statistic from a comparison of values at perennial and wet intermittent reaches. Pvl dry-t: t-statistic from a comparison of values at ephemeral and dry intermittent reaches. RF-MDA: Variable importance (as mean decrease accuracy) from a random forest model predicting perennial, intermittent, or ephemeral streamflow duration class. Black text indicates metric values that passed screening criteria, while gray text indicates metric values that did not pass screening criteria. To pass, a metric had to pass the % dominance criterion, plus any of the responsiveness criteria.

| Indicator                | Form | Description                                                    | % dom | Responsiveness criteria |            |           |             |             |           | Pass |  |
|--------------------------|------|----------------------------------------------------------------|-------|-------------------------|------------|-----------|-------------|-------------|-----------|------|--|
|                          |      |                                                                |       | PvIvE<br>F              | EvALI<br>t | PvNP<br>t | PvIwet<br>t | EvIdry<br>t | RF<br>MDA |      |  |
| Biological indicators    |      |                                                                |       |                         |            |           |             |             |           |      |  |
| Invertebrate metrics     |      |                                                                |       |                         |            |           |             |             |           |      |  |
| bmiabund_score           | O    | aquatic invertebrate abundance score (NM)                      | 40%   | 67.72                   | 12.97      | 9.03      | 2.69        | 2.56        | 0.0067    | Yes  |  |
| TotalAbundance           | C    | Total aquatic invertebrate abundance                           | 34%   | 32.63                   | 10.21      | 5.85      | 2.64        | 2.03        | 0.0094    | Yes  |  |
| Richness                 | C    | Total aquatic invertebrate richness                            | 34%   | 37.63                   | 10.72      | 6.14      | 2.53        | 2.11        | 0.0061    | Yes  |  |
| mayfly_abundance         | C    | Abundance of mayflies                                          | 49%   | 31.82                   | 10.16      | 5.79      | 2.63        | 1.26        | 0.0049    | Yes  |  |
| perennial_abundance      | C    | Abundance of perennial indicator taxa                          | 65%   | 16.05                   | 6.26       | 4.33      | 2.55        | 1.00        | 0.0004    | Yes  |  |
| perennial_taxa           | C    | Richness of perennial indicator taxa                           | 65%   | 19.02                   | 7.49       | 4.61      | 2.37        | 1.00        | 0.0010    | Yes  |  |
| perennial_live_abundance | C    | Abundance of live perennial indicator taxa                     | 66%   | 15.54                   | 6.05       | 4.29      | 2.58        | 1.00        | 0.0008    | Yes  |  |
| EPT_abundance            | C    | Ephemeroptera, Plecoptera, and Trichoptera (EPT) abundance     | 46%   | 33.09                   | 9.26       | 6.13      | 3.41        | 1.02        | 0.0045    | Yes  |  |
| EPT_taxa                 | C    | EPT richness                                                   | 46%   | 37.65                   | 10.33      | 6.65      | 3.29        | 1.59        | 0.0061    | Yes  |  |
| EPT_relabd               | C    | EPT relative abundance                                         | 46%   | 34.13                   | 10.66      | 6.40      | 2.46        | 1.32        | 0.0049    | Yes  |  |
| EPT_reltaxa              | C    | EPT relative richness                                          | 46%   | 34.64                   | 10.96      | 6.39      | 2.63        | 1.49        | 0.0056    | Yes  |  |
| GOLD_relabd              | C    | Gastropoda, Oligochaeta, and Diptera (GOLD) relative abundance | 43%   | 9.91                    | 6.06       | 1.93      | 0.75        | 1.48        | 0.0008    | Yes  |  |
| GOLD_reltaxa             | C    | GOLD relative richness                                         | 43%   | 11.79                   | 5.78       | 2.73      | 0.31        | 1.41        | 0.0027    | Yes  |  |
| OCH_relabd               | C    | Odonata, Coleoptera, and Heteroptera (OCH) relative abundance  | 56%   | 2.38                    | 2.03       | 0.19      | 1.27        | 2.27        | 0.0004    | Yes  |  |
| OCH_reltaxa              | C    | OCH relative richness                                          | 55%   | 5.10                    | 3.17       | 0.16      | 1.40        | 2.63        | 0.0004    | Yes  |  |

|                     |   |                                                                                 |     |       |      |      |      |      |             |     |
|---------------------|---|---------------------------------------------------------------------------------|-----|-------|------|------|------|------|-------------|-----|
| GOLDOCH_relabd      | C | GOLD + OCH relative abundance                                                   | 38% | 11.32 | 4.94 | 1.31 | 1.65 | 2.50 | 0.0017      | Yes |
| GOLDOCH_reltaxa     | C | GOLD + OCH relative richness                                                    | 38% | 14.34 | 5.57 | 1.94 | 1.33 | 2.68 | 0.0018      | Yes |
| Noninsect_abundance | C | Non-insect abundance                                                            | 67% | 4.01  | 4.36 | 1.57 | 1.08 | 2.01 | 0.0001      | Yes |
| Noninsect_taxa      | C | Non-insect richness                                                             | 67% | 5.95  | 5.31 | 2.00 | 0.96 | 2.00 | 0.0004      | Yes |
| Noninsect_relabund  | C | Non-insect relative abundance                                                   | 67% | 3.55  | 4.05 | 0.57 | 0.02 | 2.06 | -<br>0.0002 | Yes |
| Noninsect_reltaxa   | C | Non-insect relative richness                                                    | 67% | 4.82  | 4.93 | 0.77 | 0.49 | 2.19 | 0.0002      | Yes |
| Vertebrate metrics  |   |                                                                                 |     |       |      |      |      |      |             |     |
| fishabund_score2    | O | Fish abundance score (NM) (excluding mosquitofish)                              | 78% | 6.16  | 5.63 | 2.12 | 0.73 | 2.03 | 0.0001      | Yes |
| snake_score         | B | Presence of aquatic snakes                                                      | 97% | 0.75  | 2.03 | 0.68 | 0.54 | 1.00 | -<br>0.0001 |     |
| turt_score          | B | Presence of aquatic turtles                                                     | 99% | 0.67  | 1.00 | 1.00 | 1.00 | 0.00 | 0.0000      |     |
| frogvoc_score       | B | Presence of frog vocalizations                                                  | 93% | 3.19  | 1.47 | 1.93 | 2.31 | 0.28 | 0.0005      | Yes |
| vert_score          | B | Presence of aquatic vertebrates                                                 | 84% | 3.29  | 2.31 | 0.93 | 1.77 | 0.89 | 0.0002      | Yes |
| vertvoc_score       | B | Presence of aquatic vertebrates, including frog vocalizations                   | 81% | 3.14  | 2.04 | 1.01 | 1.95 | 0.50 | -<br>0.0003 | Yes |
| vert_sumscore       | O | Total number of aquatic vertebrate types detected                               | 84% | 3.73  | 2.47 | 1.19 | 1.88 | 1.06 | 0.0005      | Yes |
| vertvoc_sumscore    | O | Total number of aquatic vertebrate types detected, including frog vocalizations | 81% | 5.34  | 2.69 | 1.86 | 2.53 | 0.98 | 0.0012      | Yes |
| Algal metrics       |   |                                                                                 |     |       |      |      |      |      |             |     |
| algabund_score      | O | Algal abundance score (NM)                                                      | 49% | 24.96 | 8.93 | 5.06 | 1.28 | 1.81 | 0.0053      | Yes |
| alglive_cover_score | O | Live algal cover on the streambed                                               | 51% | 24.38 | 7.89 | 5.42 | 1.61 | 1.53 | 0.0043      | Yes |
| algdead_cover_score | O | Dead algal cover on the streambed                                               | 81% | 1.22  | 1.82 | 0.06 | 0.04 | 1.37 | -<br>0.0002 |     |

|                                    |   |                                                                                   |     |       |      |      |      |      |             |     |
|------------------------------------|---|-----------------------------------------------------------------------------------|-----|-------|------|------|------|------|-------------|-----|
| algdead_noupstream_cover_score     | O | Dead algal cover on the streambed, excluding mats deposited from upstream sources | 81% | 1.53  | 2.11 | 0.13 | 0.04 | 1.51 | 0.0006      | Yes |
| alglivedead_cover_score            | O | Live or dead algal cover on the streambed                                         | 46% | 21.86 | 7.39 | 5.03 | 1.61 | 1.66 | 0.0017      | Yes |
| <b>Plant metrics</b>               |   |                                                                                   |     |       |      |      |      |      |             |     |
| vegdiff_score                      | O | Difference in vegetation score (NM)                                               | 28% | 18.42 | 5.87 | 4.80 | 1.51 | 1.11 | 0.0019      | Yes |
| rootedplants_score                 | O | Upland rooted plants in streambed score (NM)                                      | 44% | 14.92 | 4.71 | 4.15 | 0.63 | 0.80 | 0.0007      | Yes |
| hydrophytes_present_noflag         | O | Number of hydrophytic plant species observed (FACW and OBL)                       | 37% | 24.29 | 8.13 | 5.10 | 1.85 | 3.02 | 0.0042      | Yes |
| moss_cover_score                   | O | Streamer moss cover in the channel                                                | 80% | 7.34  | 4.95 | 2.81 | 1.86 | 1.46 | 0.0000      | Yes |
| liverwort_cover_score              | O | Liverwort cover in the channel                                                    | 91% | 2.04  | 3.32 | 0.20 | 0.77 | 1.00 | 0.0000      | Yes |
| PctShading                         | C | Percent stream shading                                                            | 19% | 10.12 | 5.41 | 2.69 | 1.02 | 3.32 | 0.0035      | Yes |
| <b>Other biological metrics</b>    |   |                                                                                   |     |       |      |      |      |      |             |     |
| iofb_score                         | B | Presence of iron-oxidizing fungi or bacteria (NM)                                 | 82% | 6.40  | 5.59 | 2.30 | 0.86 | 1.45 | -<br>0.0001 | Yes |
| <b>Geomorphological indicators</b> |   |                                                                                   |     |       |      |      |      |      |             |     |
| sinuosity_score                    | O | Sinuosity score (NM)                                                              | 38% | 1.70  | 1.72 | 0.27 | 0.51 | 2.15 | -<br>0.0003 | Yes |
| floodplainedim_score               | O | Floodplain and channel dimensions score (NM)                                      | 27% | 0.15  | 0.40 | 0.15 | 0.40 | 0.79 | 0.0004      |     |
| riffpoolseq_score                  | O | Riffle-pool sequence score (NM)                                                   | 28% | 11.25 | 4.10 | 3.93 | 2.09 | 1.93 | 0.0003      | Yes |
| substratesorting_score             | O | Substrate sorting score (NM)                                                      | 29% | 7.34  | 3.19 | 3.30 | 1.23 | 0.90 | 0.0001      | Yes |
| seddep_score                       | O | Sediment deposition score (NM)                                                    | 75% | 0.19  | 0.62 | 0.19 | 0.44 | 1.25 | -<br>0.0002 |     |
| BankWidthMean                      | C | Mean bankfull width                                                               | 5%  | 10.16 | 3.13 | 1.19 | 0.43 | 3.31 | 0.0029      | Yes |



|                              |   |              |                                                         |      |       |       |       |      |        |            |
|------------------------------|---|--------------|---------------------------------------------------------|------|-------|-------|-------|------|--------|------------|
| valleyslope                  | C | Valley slope | 25%                                                     | 0.20 | 0.47  | 0.14  | 0.30  | 0.69 | 0.0006 |            |
| <b>Hydrologic indicators</b> |   |              |                                                         |      |       |       |       |      |        |            |
| waterinchannel_score         | * | O            | Water in channel score (NM)                             | 53%  | 68.24 | 10.55 | 10.27 | 1.30 | 2.77   | 0.0145 Yes |
| hydric_score                 |   | B            | Presence of hydric soils (NM)                           | 78%  | 12.78 | 6.51  | 3.82  | 2.49 | 1.83   | 0.0004 Yes |
| springs_score                | * | B            | Presence of springs and seeps (NM)                      | 94%  | 0.06  | 0.02  | 0.32  | 0.06 | 1.44   | - 0.0001   |
| pctsurfaceflow               | * | C            | Percent surface flow in channel                         | 59%  | 66.26 | 11.33 | 10.72 | 1.41 | 0.82   | 0.0127 Yes |
| pctsubsurfaceflow            | * | B            | Percent surface or subsurface flow in channel           | 60%  | 59.57 | 10.53 | 9.22  | 0.55 | 1.53   | 0.0105 Yes |
| numberwoodyjams              |   | B            | Number of woody jams in reach                           | 84%  | 0.79  | 1.28  | 0.91  | 0.81 | 1.15   | 0.0001     |
| SoilMoist_MaxScore           | * | O            | Maximum soil moisture                                   | 69%  | 58.23 | 8.86  | 8.05  | 0.00 | 2.77   | 0.0133 Yes |
| <b>Geospatial indicators</b> |   |              |                                                         |      |       |       |       |      |        |            |
| Point-based metrics          |   |              |                                                         |      |       |       |       |      |        |            |
| EcolI                        |   | C            | Level 2 ecoregion                                       | 26%  | 0.49  | 1.09  | 0.69  | 0.04 | 0.94   | 0.0003     |
| EcolII                       |   | C            | Level 3 ecoregion                                       | 16%  | 5.18  | 2.80  | 2.26  | 1.74 | 2.65   | 0.0001 Yes |
| tmean                        |   | C            | 30-year normal mean annual temperature at the reach     | 1%   | 8.57  | 3.96  | 2.29  | 0.78 | 3.10   | 0.0032 Yes |
| tmax                         |   | C            | 30-year normal maximum annual temperature at the reach  | 1%   | 8.72  | 3.98  | 2.28  | 0.80 | 3.09   | 0.0028 Yes |
| tmin                         |   | C            | 30-year normal minimum annual temperature at the reach  | 1%   | 7.76  | 3.85  | 2.22  | 0.73 | 2.90   | 0.0034 Yes |
| ppt                          |   | C            | 30-year normal total annual precipitation at the reach  | 1%   | 4.47  | 4.50  | 0.68  | 0.24 | 1.99   | 0.0007 Yes |
| ppt.m01                      |   | C            | 30-year normal total January precipitation at the reach | 1%   | 4.61  | 4.62  | 0.19  | 0.88 | 1.74   | 0.0003 Yes |

|                   |   |                                                                    |     |      |      |      |      |      |             |     |
|-------------------|---|--------------------------------------------------------------------|-----|------|------|------|------|------|-------------|-----|
| ppt.m02           | C | 30-year normal total February precipitation at the reach           | 1%  | 4.82 | 4.54 | 0.19 | 0.98 | 1.71 | 0.0002      | Yes |
| ppt.m03           | C | 30-year normal total March precipitation at the reach              | 1%  | 5.04 | 4.79 | 0.41 | 0.67 | 1.86 | 0.0004      | Yes |
| ppt.m04           | C | 30-year normal total April precipitation at the reach              | 2%  | 4.79 | 4.49 | 0.85 | 0.20 | 2.03 | 0.0010      | Yes |
| ppt.m05           | C | 30-year normal total May precipitation at the reach                | 1%  | 2.64 | 2.76 | 1.13 | 0.45 | 1.73 | 0.0010      | Yes |
| ppt.m06           | C | 30-year normal total June precipitation at the reach               | 1%  | 0.72 | 1.24 | 0.58 | 0.40 | 1.16 | 0.0014      | Yes |
| ppt.m07           | C | 30-year normal total July precipitation at the reach               | 2%  | 0.91 | 0.51 | 0.93 | 1.41 | 0.29 | -<br>0.0001 |     |
| ppt.m08           | C | 30-year normal total August precipitation at the reach             | 1%  | 1.32 | 1.25 | 0.49 | 1.26 | 0.20 | 0.0006      |     |
| ppt.m09           | C | 30-year normal total September precipitation at the reach          | 1%  | 0.57 | 0.08 | 0.91 | 1.37 | 0.80 | -<br>0.0003 |     |
| ppt.m10           | C | 30-year normal total October precipitation at the reach            | 1%  | 3.23 | 3.53 | 1.17 | 0.70 | 1.90 | 0.0018      | Yes |
| ppt.m11           | C | 30-year normal total November precipitation at the reach           | 1%  | 4.02 | 4.52 | 0.36 | 0.33 | 1.83 | 0.0022      | Yes |
| ppt.m12           | C | 30-year normal total December precipitation at the reach           | 1%  | 3.96 | 4.20 | 0.13 | 0.88 | 1.68 | 0.0009      | Yes |
| StreamCat metrics |   |                                                                    |     |      |      |      |      |      |             |     |
| ElevCat           | C | Mean elevation in the catchment                                    | 2%  | 3.68 | 2.57 | 2.06 | 0.91 | 1.59 | 0.0005      | Yes |
| ElevWs            | C | Mean elevation in the watershed                                    | 2%  | 6.62 | 3.15 | 3.14 | 1.83 | 1.68 | 0.0003      | Yes |
| AgKffactCat       | C | Soil erodibility (k-factor) in agricultural lands in the catchment | 69% | 0.25 | 0.67 | 0.54 | 0.77 | 0.66 | -<br>0.0001 |     |

|            |   |                                                                    |     |      |      |      |      |      |        |        |     |
|------------|---|--------------------------------------------------------------------|-----|------|------|------|------|------|--------|--------|-----|
| KffactCat  | C | Soil erodibility (k-factor) in the catchment                       | 2%  | 0.50 | 1.00 | 0.27 | 0.94 | 0.25 | -      | 0.0002 |     |
| AgKffactWs | C | Soil erodibility (k-factor) in agricultural lands in the watershed | 45% | 1.21 | 2.63 | 0.81 | 0.64 | 0.99 | -      | 0.0006 | Yes |
| KffactWs   | C | Soil erodibility (k-factor) in the watershed                       | 2%  | 0.34 | 0.70 | 0.67 | 0.12 | 1.10 | 0.0001 |        |     |
| Al2O3Cat   | C | Al2O3 content in the catchment geology                             | 2%  | 0.43 | 0.81 | 0.82 | 0.01 | 0.13 | -      | 0.0005 |     |
| CaOCat     | C | CaO content in the catchment geology                               | 2%  | 2.04 | 2.37 | 0.50 | 0.06 | 1.37 | -      | 0.0011 | Yes |
| Fe2O3Cat   | C | Fe2O3 content in the catchment geology                             | 2%  | 0.26 | 0.69 | 0.01 | 0.15 | 0.86 | -      | 0.0003 |     |
| K2OCat     | C | K2O content in the catchment geology                               | 2%  | 0.12 | 0.52 | 0.22 | 0.63 | 0.53 | -      | 0.0005 |     |
| MgOCat     | C | MgO content in the catchment geology                               | 2%  | 3.22 | 3.04 | 1.55 | 1.32 | 1.75 | 0.0008 |        | Yes |
| Na2OCat    | C | Na2O content in the catchment geology                              | 2%  | 1.27 | 1.70 | 1.03 | 0.05 | 0.86 | 0.0006 |        |     |
| P2O5Cat    | C | P2O5 content in the catchment geology                              | 2%  | 0.50 | 1.09 | 0.10 | 0.51 | 1.68 | -      | 0.0003 |     |
| SCat       | C | S content in the catchment geology                                 | 2%  | 0.34 | 0.53 | 0.85 | 0.64 | 0.30 | 0.0006 |        |     |
| SiO2Cat    | C | SiO2 content in the catchment geology                              | 2%  | 0.79 | 1.37 | 0.30 | 0.27 | 1.01 | -      | 0.0003 |     |
| Al2O3Ws    | C | Al2O3 content in the watershed geology                             | 2%  | 1.78 | 1.78 | 1.02 | 0.89 | 0.29 | -      | 0.0008 |     |
| CaOWs      | C | CaO content in the watershed geology                               | 2%  | 0.69 | 0.80 | 0.31 | 1.63 | 0.43 | -      | 0.0002 |     |
| Fe2O3Ws    | C | Fe2O3 content in the watershed geology                             | 2%  | 1.25 | 1.30 | 1.38 | 0.22 | 0.61 | 0.0007 |        |     |
| K2OWs      | C | K2O content in the watershed geology                               | 2%  | 0.14 | 0.47 | 0.02 | 1.12 | 0.17 | -      | 0.0002 |     |

|               |   |                                                            |    |      |      |      |      |      |             |     |
|---------------|---|------------------------------------------------------------|----|------|------|------|------|------|-------------|-----|
| MgOWs         | C | MgO content in the watershed geology                       | 2% | 0.50 | 0.65 | 0.28 | 2.70 | 0.29 | 0.0007      | Yes |
| Na2OWs        | C | Na2O content in the watershed geology                      | 2% | 1.03 | 1.38 | 0.95 | 0.41 | 0.32 | -<br>0.0002 |     |
| P2O5Ws        | C | P2O5 content in the watershed geology                      | 2% | 0.89 | 1.38 | 0.55 | 0.58 | 1.25 | 0.0002      |     |
| SWs           | C | S content in the watershed geology                         | 2% | 0.74 | 1.07 | 1.44 | 0.69 | 1.47 | -<br>0.0004 |     |
| SiO2Ws        | C | SiO2 content in the watershed geology                      | 2% | 0.91 | 0.61 | 0.76 | 2.33 | 0.38 | -<br>0.0001 | Yes |
| NCat          | C | N content in the catchment geology                         | 2% | 1.23 | 1.60 | 0.92 | 0.47 | 1.03 | 0.0003      |     |
| NWs           | C | N content in the watershed geology                         | 2% | 1.19 | 1.27 | 0.73 | 0.60 | 0.68 | -<br>0.0003 |     |
| HydrlCondCat  | C | Mean hydraulic conductivity in the catchment               | 2% | 2.18 | 1.65 | 0.57 | 0.31 | 1.16 | -<br>0.0007 | Yes |
| HydrlCondWs   | C | Mean hydraulic conductivity in the watershed               | 2% | 1.11 | 1.09 | 0.32 | 0.62 | 1.33 | -<br>0.0002 |     |
| CompStrgthCat | C | Mean compressive strength in the catchment                 | 2% | 5.80 | 3.62 | 1.55 | 0.32 | 1.91 | -<br>0.0001 | Yes |
| CompStrgthWs  | C | Mean compressive strength in the watershed                 | 2% | 2.62 | 2.28 | 0.88 | 0.12 | 0.84 | -<br>0.0010 | Yes |
| Precip8110Cat | C | 30-year normal total annual precipitation in the catchment | 2% | 4.34 | 4.44 | 0.63 | 0.30 | 1.88 | 0.0004      | Yes |
| Tmax8110Cat   | C | 30-year normal max annual temperature in the catchment     | 2% | 9.79 | 4.11 | 2.67 | 0.92 | 2.99 | 0.0004      | Yes |
| Tmean8110Cat  | C | 30-year normal mean annual temperature in the catchment    | 2% | 9.68 | 4.11 | 2.69 | 0.93 | 3.07 | 0.0014      | Yes |
| Tmin8110Cat   | C | 30-year normal min annual temperature in the catchment     | 2% | 8.92 | 4.03 | 2.63 | 0.91 | 2.97 | 0.0018      | Yes |
| Precip8110Ws  | C | 30-year normal total annual precipitation in the watershed | 2% | 5.57 | 5.39 | 1.67 | 0.60 | 1.81 | 0.0000      | Yes |

|             |   |                                                         |     |       |      |      |      |      |             |     |
|-------------|---|---------------------------------------------------------|-----|-------|------|------|------|------|-------------|-----|
| Tmax8110Ws  | C | 30-year normal max annual temperature in the watershed  | 2%  | 12.44 | 4.67 | 3.57 | 1.80 | 3.41 | 0.0005      | Yes |
| Tmean8110Ws | C | 30-year normal mean annual temperature in the watershed | 2%  | 11.40 | 4.52 | 3.36 | 1.59 | 3.32 | 0.0024      | Yes |
| Tmin8110Ws  | C | 30-year normal min annual temperature in the watershed  | 2%  | 9.93  | 4.28 | 3.07 | 1.35 | 3.06 | 0.0005      | Yes |
| ClayCat     | C | Mean % clay content of soils in the catchment           | 2%  | 0.64  | 0.64 | 0.60 | 0.34 | 2.23 | -<br>0.0006 | Yes |
| SandCat     | C | Mean % sand content of soils in the catchment           | 2%  | 0.16  | 0.41 | 0.11 | 0.59 | 1.63 | -<br>0.0004 |     |
| ClayWs      | C | Mean % clay content of soils in the watershed           | 2%  | 0.97  | 0.84 | 1.34 | 0.77 | 1.32 | -<br>0.0001 |     |
| SandWs      | C | Mean % sand content of soils in the watershed           | 2%  | 0.83  | 0.81 | 1.20 | 0.10 | 1.56 | 0.0001      |     |
| OmCat       | C | Mean % organic matter content of soils in the catchment | 2%  | 2.54  | 3.04 | 0.20 | 0.21 | 1.56 | -<br>0.0007 | Yes |
| PermCat     | C | Mean permeability of soils in the catchment             | 2%  | 0.84  | 0.75 | 0.48 | 0.10 | 1.74 | -<br>0.0002 |     |
| RckDepCat   | C | Mean depth to bedrock in the catchment                  | 13% | 0.55  | 1.02 | 0.16 | 0.46 | 0.21 | 0.0005      |     |
| WtDepCat    | C | Mean seasonal water table depth in the catchment        | 55% | 0.99  | 1.73 | 0.83 | 0.96 | 1.30 | 0.0005      |     |
| OmWs        | C | Mean % organic matter content of soils in the watershed | 2%  | 1.57  | 1.98 | 0.08 | 0.85 | 1.20 | -<br>0.0005 |     |
| PermWs      | C | Mean permeability of soils in the watershed             | 2%  | 1.50  | 1.02 | 1.50 | 0.67 | 0.95 | -<br>0.0001 |     |
| RckDepWs    | C | Mean depth to bedrock in the watershed                  | 2%  | 2.12  | 0.46 | 2.09 | 1.29 | 0.41 | 0.0009      | Yes |
| WtDepWs     | C | Mean seasonal water table depth in the watershed        | 41% | 0.49  | 0.86 | 0.73 | 0.15 | 0.57 | 0.0000      |     |

|                    |   |                                                                                        |      |      |      |      |      |      |             |     |
|--------------------|---|----------------------------------------------------------------------------------------|------|------|------|------|------|------|-------------|-----|
| PctCarbResidCat    | C | Percent carbonate residual material in catchment geology                               | 92%  | 0.51 | 0.60 | 0.74 | 0.77 | 0.32 | 0.0000      |     |
| PctNonCarbResidCat | C | Percent non-carbonate residual material in catchment geology                           | 48%  | 0.23 | 0.35 | 0.70 | 0.16 | 0.01 | -<br>0.0001 |     |
| PctAlkIntruVolCat  | C | Percent alkaline intrusive volcanic material in catchment geology                      | 98%  | 3.12 | 1.44 | 1.42 | 1.00 | 1.00 | 0.0000      |     |
| PctSilicCat        | C | Percent silicic material in catchment geology                                          | 52%  | 4.62 | 3.94 | 1.29 | 0.14 | 1.71 | 0.0007      | Yes |
| PctEolCrsCat       | C | Percent coarse eolian sediment material in catchment geology                           | 99%  | 1.51 | 1.00 | 1.00 | 0.00 | 1.00 | 0.0000      |     |
| PctEolFineCat      | C | Percent fine eolian sediment material in catchment geology                             | 100% | 0.00 | 0.00 | 0.00 | 0.00 | 0.00 | 0.0000      |     |
| PctAlluvCoastCat   | C | Percent alluvium and fine-textured coastal zone sediment material in catchment geology | 49%  | 2.87 | 2.06 | 0.42 | 0.79 | 1.56 | -<br>0.0002 | Yes |
| PctCarbResidWs     | C | Percent carbonate residual material in watershed geology                               | 65%  | 0.13 | 0.47 | 0.15 | 0.36 | 0.41 | 0.0001      |     |
| PctNonCarbResidWs  | C | Percent non-carbonate residual material in watershed geology                           | 25%  | 0.93 | 0.95 | 1.35 | 0.02 | 0.09 | 0.0002      |     |
| PctAlkIntruVolWs   | C | Percent alkaline intrusive volcanic material in watershed geology                      | 98%  | 3.12 | 1.44 | 1.42 | 1.00 | 1.00 | 0.0000      |     |
| PctSilicWs         | C | Percent silicic material in watershed geology                                          | 30%  | 3.29 | 2.85 | 1.00 | 0.30 | 1.06 | 0.0001      | Yes |
| PctExtruVolWs      | C | Percent extrusive volcanic material in watershed geology                               | 95%  | 0.67 | 1.53 | 0.75 | 0.68 | 1.14 | 0.0001      |     |

|                 |   |                                                                                            |     |      |      |      |      |      |        |        |
|-----------------|---|--------------------------------------------------------------------------------------------|-----|------|------|------|------|------|--------|--------|
| PctEolCrsWs     | C | Percent coarse eolian sediment material in watershed geology                               | 96% | 0.67 | 0.36 | 1.26 | 0.54 | 0.83 | 0.0000 |        |
| PctEolFineWs    | C | Percent fine eolian sediment material in watershed geology                                 | 98% | 0.33 | 1.41 | 0.38 | 1.00 | 1.00 | 0.0000 |        |
| PctAlluvCoastWs | C | Percent alluvium and fine-textured coastal zone sediment material in watershed geology     | 41% | 1.57 | 1.53 | 0.11 | 0.64 | 1.72 | -      | 0.0003 |
| WetIndexCat     | C | Mean composite topographic index (wetness index) in the catchment                          | 2%  | 3.01 | 1.85 | 2.25 | 0.98 | 0.57 | 0.0001 | Yes    |
| WetIndexWs      | C | Mean composite topographic index (wetness index) in the watershed                          | 2%  | 0.95 | 1.48 | 0.85 | 0.29 | 0.68 | 0.0005 |        |
| urb             | C | Total percent urban landcover in the catchment                                             | 28% | 3.62 | 2.11 | 1.26 | 0.95 | 2.63 | 0.0001 | Yes    |
| urbRip          | C | Total percent urban landcover in the catchment within 100 m of the stream flow-line        | 36% | 1.05 | 1.39 | 0.37 | 0.48 | 2.56 | 0.0003 | Yes    |
| forr            | C | Total percent forested landcover in the catchment                                          | 36% | 5.07 | 3.76 | 2.27 | 1.50 | 2.03 | 0.0006 | Yes    |
| forrRip         | C | Total percent forested landcover in the catchment within 100 m of the stream flow-line     | 44% | 4.79 | 4.13 | 1.99 | 0.92 | 1.95 | 0.0002 | Yes    |
| ag              | C | Total percent agricultural landcover in the catchment                                      | 70% | 0.17 | 0.66 | 0.39 | 0.56 | 0.67 | -      | 0.0003 |
| agRip           | C | Total percent agricultural landcover in the catchment within 100 m of the stream flow-line | 80% | 0.79 | 1.35 | 0.97 | 1.55 | 1.01 | -      | 0.0001 |

|               |   |                                                                                            |     |       |      |      |      |      |          |     |
|---------------|---|--------------------------------------------------------------------------------------------|-----|-------|------|------|------|------|----------|-----|
| wetlands      | C | Total percent wetlands landcover in the catchment                                          | 41% | 4.39  | 3.57 | 2.29 | 1.41 | 0.94 | 0.0004   | Yes |
| wetlandsRip   | C | Total percent wetlands landcover in the catchment within 100 m of the stream flow-line     | 45% | 9.40  | 3.98 | 3.27 | 2.54 | 0.59 | 0.0020   | Yes |
| urbWs         | C | Total percent urban landcover in the watershed                                             | 17% | 0.76  | 1.06 | 0.23 | 0.66 | 2.40 | - 0.0003 | Yes |
| urbRipWs      | C | Total percent urban landcover in the watershed within 100 m of the stream flow-line        | 21% | 0.57  | 0.54 | 0.57 | 0.10 | 2.25 | 0.0002   | Yes |
| forrWs        | C | Total percent forested landcover in the watershed                                          | 2%  | 12.41 | 5.17 | 3.85 | 2.60 | 3.09 | 0.0011   | Yes |
| forrWsRip     | C | Total percent forested landcover in the watershed within 100 m of the stream flow-line     | 3%  | 13.56 | 5.56 | 3.96 | 2.44 | 3.04 | 0.0017   | Yes |
| agWs          | C | Total percent agricultural landcover in the watershed                                      | 51% | 0.91  | 2.34 | 0.50 | 0.24 | 0.92 | - 0.0002 | Yes |
| agRipWs       | C | Total percent agricultural landcover in the watershed within 100 m of the stream flow-line | 55% | 1.10  | 2.56 | 0.70 | 0.64 | 1.00 | - 0.0004 | Yes |
| wetlandsWs    | C | Total percent wetlands landcover in the watershed                                          | 20% | 3.76  | 3.95 | 1.85 | 0.43 | 0.03 | 0.0004   | Yes |
| wetlandsRipWS | C | Total percent wetlands landcover in the watershed within 100 m of the stream flow-line     | 23% | 7.48  | 4.98 | 2.67 | 0.75 | 0.97 | - 0.0006 | Yes |



File S3.2 Spearman rank correlations between indicators and ordination axes shown in [Error! Reference source not found.](#)

Part 1: Biological, geomorphological, and hydrologic indicators

| Indicator                | Rho1  | Rho2  | Indicator                   | Rho1  | Rho2  |
|--------------------------|-------|-------|-----------------------------|-------|-------|
| Biological indicators    |       |       |                             |       |       |
| Invertebrate metrics     |       |       | Geomorphological indicators |       |       |
| bmiabund_score           | -0.88 | -0.08 | sinuosity_score             | 0.01  | 0.07  |
| TotalAbundance           | -0.90 | -0.08 | floodplaindim_score         | -0.12 | 0.02  |
| Richness                 | -0.90 | -0.10 | riffpoolseq_score           | -0.59 | 0.07  |
| mayfly_abundance         | -0.83 | -0.12 | substratesorting_score      | -0.63 | -0.05 |
| perennial_abundance      | -0.72 | -0.15 | seddep_score                | -0.25 | -0.20 |
| perennial_taxa           | -0.71 | -0.14 | BankWidthMean               | 0.14  | -0.01 |
| perennial_live_abundance | -0.72 | -0.15 | valleyslope                 | -0.24 | 0.04  |
| EPT_abundance            | -0.84 | -0.11 | Hydrologic indicators       |       |       |
| EPT_taxa                 | -0.83 | -0.14 | waterinchannel_score        | -0.85 | -0.29 |
| EPT_relabd               | -0.76 | -0.16 | hydric_score                | -0.50 | -0.40 |
| EPT_reltaxa              | -0.76 | -0.15 | springs_score               | -0.18 | 0.17  |
| GOLD_relabd              | -0.70 | 0.12  | pctsurfaceflow              | -0.82 | -0.19 |
| GOLD_reltaxa             | -0.70 | 0.10  | pctsubsurfaceflow           | -0.81 | -0.26 |
| OCH_relabd               | -0.64 | -0.11 | numberwoodyjams             | 0.01  | 0.05  |
| OCH_reltaxa              | -0.61 | -0.11 | SoilMoist_MaxScore          | -0.84 | -0.15 |
| GOLDOCH_relabd           | -0.67 | -0.02 | Geospatial indicators       |       |       |
| GOLDOCH_reltaxa          | -0.67 | -0.05 | Point-based metrics         |       |       |
| Noninsect_abundance      | -0.60 | 0.08  | Ecoll                       | -0.29 | 0.12  |
| Noninsect_taxa           | -0.60 | 0.08  | Ecolll                      | -0.05 | 0.18  |
| Noninsect_relabund       | -0.55 | 0.13  | tmean                       | 0.01  | 0.16  |
| Noninsect_reltaxa        | -0.55 | 0.13  | tmax                        | 0.02  | 0.16  |
| Vertebrate metrics       |       |       | tmin                        | 0.03  | 0.14  |
| fishabund_score2         | -0.37 | -0.25 | ppt                         | -0.39 | 0.12  |
| snake_score              | -0.23 | 0.23  |                             |       |       |
| turt_score               | -0.15 | 0.12  |                             |       |       |

|                                |       |       |         |       |       |
|--------------------------------|-------|-------|---------|-------|-------|
| frogvoc_score                  | -0.31 | 0.36  | ppt.m01 | -0.34 | 0.05  |
| vert_score                     | -0.51 | 0.63  | ppt.m02 | -0.31 | 0.06  |
| vertvoc_score                  | -0.53 | 0.65  | ppt.m03 | -0.31 | 0.08  |
| vert_sumscore                  | -0.51 | 0.63  | ppt.m04 | -0.17 | 0.07  |
| vertvoc_sumscore               | -0.53 | 0.65  | ppt.m05 | 0.02  | -0.01 |
| Algal metrics                  |       |       | ppt.m06 | 0.05  | -0.05 |
| algabund_score                 | -0.77 | 0.16  | ppt.m07 | 0.00  | 0.04  |
| alglive_cover_score            | -0.81 | 0.15  | ppt.m08 | 0.02  | 0.02  |
| algdead_cover_score            | -0.36 | 0.21  | ppt.m09 | 0.05  | 0.02  |
| algdead_noupstream_cover_score | -0.39 | 0.20  | ppt.m10 | 0.03  | -0.02 |
| alglivedead_cover_score        | -0.75 | 0.23  | ppt.m11 | -0.30 | 0.04  |
| Plant metrics                  |       |       | ppt.m12 | -0.36 | 0.04  |
| vegdiff_score                  | -0.62 | -0.29 |         |       |       |
| rootedplants_score             | -0.59 | -0.27 |         |       |       |
| hydrophytes_present_noflag     | -0.67 | -0.20 |         |       |       |
| moss_cover_score               | -0.29 | 0.03  |         |       |       |
| liverwort_cover_score          | -0.14 | -0.12 |         |       |       |
| PctShading                     | -0.35 | -0.16 |         |       |       |
| Other biological metrics       |       |       |         |       |       |
| iofb_score                     | -0.44 | -0.22 |         |       |       |

File S3.2, Part 2: Geospatial metrics from the StreamCat dataset [40].

| StreamCat metrics | Rho1  | Rho2  | StreamCat metrics  | Rho1  | Rho2  |
|-------------------|-------|-------|--------------------|-------|-------|
| ElevCat           | -0.01 | -0.11 | OmCat              | -0.16 | 0.05  |
| ElevWs            | -0.02 | -0.24 | PermCat            | -0.08 | -0.22 |
| AgKffactCat       | 0.17  | -0.08 | RckDepCat          | 0.18  | -0.13 |
| KffactCat         | 0.20  | 0.02  | WtDepCat           | 0.06  | -0.08 |
| AgKffactWs        | 0.02  | -0.02 | OmWs               | -0.11 | 0.00  |
| KffactWs          | 0.10  | 0.06  | PermWs             | -0.11 | -0.13 |
| Al2O3Cat          | -0.07 | 0.07  | RckDepWs           | -0.02 | -0.08 |
| CaOCat            | -0.25 | 0.06  | WtDepWs            | 0.15  | 0.00  |
| Fe2O3Cat          | 0.10  | -0.13 | PctCarbResidCat    | -0.08 | 0.20  |
| K2OCat            | 0.10  | 0.04  | PctNonCarbResidCat | -0.04 | -0.06 |
| MgOCat            | -0.32 | 0.10  | PctSilicicCat      | -0.26 | 0.10  |
| Na2OCat           | -0.08 | 0.02  | PctEolCrCat        | 0.14  | -0.05 |
| P2O5Cat           | 0.06  | -0.07 | PctAlluvCoastCat   | 0.23  | -0.14 |
| SCat              | 0.04  | -0.10 | PctCarbResidWs     | 0.06  | 0.17  |
| SiO2Cat           | 0.09  | 0.11  | PctNonCarbResidWs  | 0.22  | -0.03 |
| Al2O3Ws           | -0.29 | -0.06 | PctSilicicWs       | -0.36 | -0.01 |
| CaOWs             | -0.01 | 0.13  | PctExtruVolWs      | 0.06  | -0.06 |
| Fe2O3Ws           | -0.16 | -0.14 | PctEolCrWs         | 0.03  | -0.16 |
| K2OWs             | -0.14 | -0.08 | PctEolFineWs       | 0.01  | -0.20 |
| MgOWs             | -0.09 | 0.14  | PctAlluvCoastWs    | 0.12  | -0.14 |
| Na2OWs            | -0.27 | -0.06 | WetIndexCat        | 0.30  | -0.10 |
| P2O5Ws            | -0.08 | 0.04  | WetIndexWs         | 0.26  | -0.03 |
| SWs               | 0.32  | 0.08  | urb                | 0.08  | -0.18 |
| SiO2Ws            | -0.05 | -0.02 | urbRip             | 0.05  | -0.13 |
| NCat              | 0.21  | -0.18 | forr               | -0.18 | -0.08 |
| NWs               | 0.25  | -0.12 | forrRip            | -0.23 | 0.02  |
| HydrCondCat       | 0.20  | -0.15 | ag                 | 0.17  | -0.05 |
| HydrCondWs        | 0.08  | -0.16 | agRip              | 0.05  | -0.06 |
| CompStrgthCat     | -0.30 | 0.12  | wetlands           | -0.33 | -0.02 |
| CompStrgthWs      | -0.32 | 0.05  | wetlandsRip        | -0.35 | 0.05  |
| Precip8110Cat     | -0.39 | 0.12  | urbWs              | -0.08 | -0.13 |
| Tmax8110Cat       | 0.07  | 0.13  | urbRipWs           | -0.11 | -0.18 |
| Tmean8110Cat      | 0.05  | 0.12  | forrWs             | -0.23 | -0.14 |
| Tmin8110Cat       | 0.06  | 0.12  | forrWsRip          | -0.27 | -0.15 |
| Precip8110Ws      | -0.42 | -0.19 | agWs               | -0.04 | -0.10 |
| Tmax8110Ws        | 0.06  | 0.25  | agRipWs            | -0.10 | -0.08 |
| Tmean8110Ws       | 0.04  | 0.23  | wetlandsWs         | -0.29 | -0.03 |
| Tmin8110Ws        | 0.05  | 0.18  | wetlandsRipWS      | -0.33 | -0.02 |
| ClayCat           | 0.05  | 0.13  |                    |       |       |
| SandCat           | -0.09 | -0.12 |                    |       |       |
| ClayWs            | -0.05 | 0.07  |                    |       |       |
| SandWs            | -0.01 | -0.11 |                    |       |       |

File S4. Performance evaluation measures for all models across each sub-region.

File S4.1. Plot of performance statistics for all models by sub-region.

The outlined symbols represent final selected model, and SDAM AW represents the final, simplified version that includes single indicators. EnotP: Proportion of ephemeral reaches correctly not classified as perennial. EvAll: Proportion of reaches correctly classified as ephemeral or at least intermittent. Proportion of dry reaches correctly classified as ephemeral or intermittent. PnotE: Proportion of perennial reaches correctly not classified as ephemeral. PvlvE: Proportion of reaches correctly classified perennial, intermittent, or ephemeral. Pvlwet: Proportion of flowing reaches correctly classified as perennial or intermittent. PvnP: Proportion of reaches correctly classified as perennial or non-perennial. GIS: Models that include geospatial data. H2O: Models that include direct measures of water presence. Other: Models that either exclude geospatial metrics and direct measures of water presence, or results from the PNW and NM SDAMs.

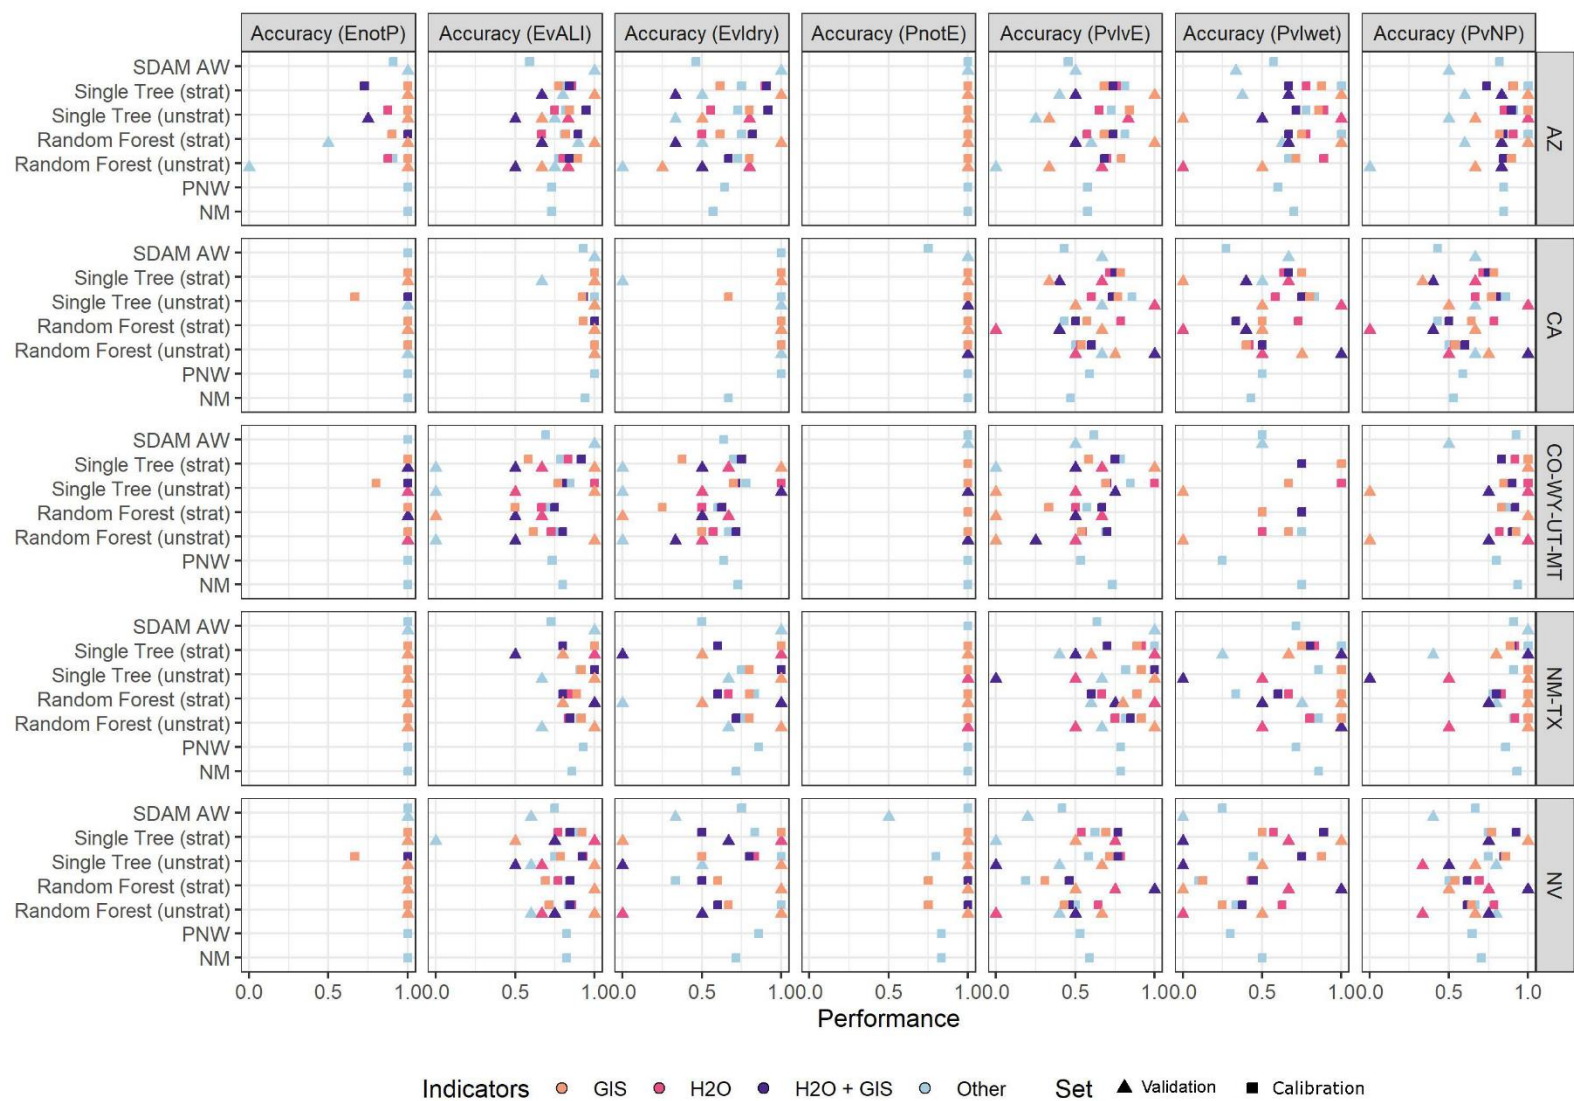

#### File S4.2 Table of performance statistics for all models by sub-region

SDAM AW: the final Streamflow Duration Assessment Method for the AW, including all modifications and use of single indicators. NM: the New Mexico method [34]. PNW: the Pacific Northwest method [27]. Base: Biological metrics, geomorphological metrics, and hydrologic metrics that did not directly measure the presence of water. GIS: Geospatial metrics. H2O: Hydrological metrics that directly measure the presence of surface water. Model type is the approach used to develop the final method. ST: single decision tree. RF: random forest. Accuracy measures are proportion of correct classifications for a variety of comparisons. EnotP: Proportion of ephemeral reaches correctly not classified as perennial. Evldry: Proportion of dry reaches correctly classified as ephemeral or intermittent. EvALL: Proportion of reaches correctly classified as ephemeral or at least intermittent reaches. PnotE: Proportion of perennial reaches correctly not classified as ephemeral. PvlvE: Proportion of reaches correctly classified as perennial, intermittent, or ephemeral. Pvlwet: Proportion of flowing reaches correctly classified as perennial or intermittent. PvNP: Proportion of reaches correctly classified as perennial or non-perennial. Repeatability: Proportion of revisited reaches with the same classification for each visit. n: Number of reaches evaluated in the comparison. % cor: Percent correct. Asterisk indicates the model that was selected for refinement to create the final model. Due to the small sizes of data sets, calibration and validation results are combined.

|                      |  |         | AZ       |       | CA    |       | CO-WY-UT-MT |       | NM-TX |       | NV    |       |
|----------------------|--|---------|----------|-------|-------|-------|-------------|-------|-------|-------|-------|-------|
|                      |  |         | Accuracy |       | % cor |       | % cor       |       | % cor |       | % cor |       |
| <i>Final methods</i> |  | Measure | n        | % cor | n     | % cor | n           | % cor | n     | % cor | n     | % cor |
| SDAM AW              |  | EnotP   | 12       | 0.92  | 3     | 1.00  | 6           | 1.00  | 5     | 1.00  | 4     | 1.00  |
| SDAM AW              |  | Evidry  | 14       | 0.57  | 3     | 1.00  | 11          | 0.64  | 7     | 0.86  | 7     | 0.71  |
| SDAM AW              |  | EvALI   | 26       | 0.73  | 17    | 0.94  | 15          | 0.73  | 14    | 0.86  | 17    | 0.88  |
| SDAM AW              |  | PnotE   | 6        | 1.00  | 5     | 0.80  | 3           | 1.00  | 5     | 1.00  | 6     | 1.00  |
| SDAM AW              |  | PvIvE   | 26       | 0.54  | 17    | 0.53  | 15          | 0.60  | 14    | 0.79  | 17    | 0.47  |
| SDAM AW              |  | PvIwet  | 10       | 0.60  | 14    | 0.43  | 4           | 0.50  | 7     | 0.71  | 10    | 0.30  |
| SDAM AW              |  | PvNP    | 26       | 0.77  | 17    | 0.53  | 15          | 0.87  | 14    | 0.93  | 17    | 0.59  |
| NM                   |  | EnotP   | 12       | 1.00  | 3     | 1.00  | 6           | 1.00  | 5     | 1.00  | 4     | 1.00  |
| NM                   |  | Evidry  | 14       | 0.57  | 3     | 0.67  | 11          | 0.73  | 7     | 0.71  | 7     | 0.71  |
| NM                   |  | EvALI   | 26       | 0.73  | 17    | 0.94  | 15          | 0.80  | 14    | 0.86  | 17    | 0.82  |
| NM                   |  | PnotE   | 6        | 1.00  | 5     | 1.00  | 3           | 1.00  | 5     | 1.00  | 6     | 0.83  |
| NM                   |  | PvIvE   | 26       | 0.58  | 17    | 0.47  | 15          | 0.73  | 14    | 0.79  | 17    | 0.59  |
| NM                   |  | PvIwet  | 10       | 0.70  | 14    | 0.43  | 4           | 0.75  | 7     | 0.86  | 10    | 0.50  |
| NM                   |  | PvNP    | 26       | 0.85  | 17    | 0.53  | 15          | 0.93  | 14    | 0.93  | 17    | 0.71  |
| PNW                  |  | EnotP   | 12       | 1.00  | 3     | 1.00  | 6           | 1.00  | 5     | 1.00  | 4     | 1.00  |
| PNW                  |  | Evidry  | 14       | 0.64  | 3     | 1.00  | 11          | 0.64  | 7     | 0.86  | 7     | 0.86  |
| PNW                  |  | EvALI   | 26       | 0.73  | 17    | 1.00  | 15          | 0.73  | 14    | 0.93  | 17    | 0.82  |
| PNW                  |  | PnotE   | 6        | 1.00  | 5     | 1.00  | 3           | 1.00  | 5     | 1.00  | 6     | 0.83  |
| PNW                  |  | PvIvE   | 26       | 0.58  | 17    | 0.59  | 15          | 0.53  | 14    | 0.79  | 17    | 0.53  |
| PNW                  |  | PvIwet  | 10       | 0.60  | 14    | 0.50  | 4           | 0.25  | 7     | 0.71  | 10    | 0.30  |
| PNW                  |  | PvNP    | 26       | 0.85  | 17    | 0.59  | 15          | 0.80  | 14    | 0.86  | 17    | 0.65  |

| Calibrated models |            | Model Type | Accuracy Measure |    |      |    |      |    |      |    |      |    |      |
|-------------------|------------|------------|------------------|----|------|----|------|----|------|----|------|----|------|
| Indicators        | Stratified |            |                  |    |      |    |      |    |      |    |      |    |      |
| Base              | No         | RF         | EnotP            | 12 | 0.83 | 3  | 1.00 | 6  | 1.00 | 5  | 1.00 | 4  | 1.00 |
| Base              | No         | RF         | Evldry           | 14 | 0.57 | 3  | 1.00 | 11 | 0.55 | 7  | 0.71 | 7  | 0.71 |
| Base              | No         | RF         | EvALI            | 26 | 0.77 | 17 | 1.00 | 15 | 0.67 | 14 | 0.86 | 17 | 0.76 |
| Base              | No         | RF         | PnotE            | 6  | 1.00 | 5  | 1.00 | 3  | 1.00 | 5  | 1.00 | 6  | 1.00 |

|      |     |    |        |    |      |    |      |    |      |    |      |    |      |
|------|-----|----|--------|----|------|----|------|----|------|----|------|----|------|
| Base | No  | RF | PvIvE  | 26 | 0.58 | 17 | 0.53 | 15 | 0.60 | 14 | 0.79 | 17 | 0.47 |
| Base | No  | RF | PvIwet | 10 | 0.60 | 14 | 0.43 | 4  | 0.75 | 7  | 0.86 | 10 | 0.30 |
| Base | No  | RF | PvNP   | 26 | 0.73 | 17 | 0.53 | 15 | 0.93 | 14 | 0.93 | 17 | 0.71 |
| Base | No  | ST | EnotP  | 12 | 1.00 | 3  | 1.00 | 6  | 1.00 | 5  | 1.00 | 4  | 1.00 |
| Base | No  | ST | EvIdry | 14 | 0.64 | 3  | 1.00 | 11 | 0.64 | 7  | 0.71 | 7  | 0.71 |
| Base | No  | ST | EvALI  | 26 | 0.81 | 17 | 1.00 | 15 | 0.73 | 14 | 0.86 | 17 | 0.71 |
| Base | No  | ST | PnotE  | 6  | 1.00 | 5  | 1.00 | 3  | 1.00 | 5  | 1.00 | 6  | 0.83 |
| Base | No  | ST | PvIvE  | 26 | 0.65 | 17 | 0.82 | 15 | 0.73 | 14 | 0.79 | 17 | 0.53 |
| Base | No  | ST | PvIwet | 10 | 0.70 | 14 | 0.79 | 4  | 1.00 | 7  | 0.86 | 10 | 0.40 |
| Base | No  | ST | PvNP   | 26 | 0.85 | 17 | 0.82 | 15 | 1.00 | 14 | 0.93 | 17 | 0.76 |
| Base | Yes | RF | EnotP  | 12 | 0.92 | 3  | 1.00 | 6  | 1.00 | 5  | 1.00 | 4  | 1.00 |
| Base | Yes | RF | EvIdry | 14 | 0.71 | 3  | 1.00 | 11 | 0.55 | 7  | 0.71 | 7  | 0.43 |
| Base | Yes | RF | EvALI  | 26 | 0.85 | 17 | 1.00 | 15 | 0.67 | 14 | 0.86 | 17 | 0.71 |
| Base | Yes | RF | PnotE  | 6  | 1.00 | 5  | 1.00 | 3  | 1.00 | 5  | 1.00 | 6  | 1.00 |
| Base | Yes | RF | PvIvE  | 26 | 0.73 | 17 | 0.47 | 15 | 0.53 | 14 | 0.64 | 17 | 0.24 |
| Base | Yes | RF | PvIwet | 10 | 0.70 | 14 | 0.36 | 4  | 0.50 | 7  | 0.57 | 10 | 0.10 |
| Base | Yes | RF | PvNP   | 26 | 0.85 | 17 | 0.47 | 15 | 0.87 | 14 | 0.79 | 17 | 0.53 |
| Base | Yes | ST | EnotP  | 12 | 1.00 | 3  | 1.00 | 6  | 1.00 | 5  | 1.00 | 4  | 1.00 |
| Base | Yes | ST | EvIdry | 14 | 0.71 | 3  | 0.67 | 11 | 0.64 | 7  | 1.00 | 7  | 0.71 |
| Base | Yes | ST | EvALI  | 26 | 0.81 | 17 | 0.94 | 15 | 0.73 | 14 | 1.00 | 17 | 0.82 |
| Base | Yes | ST | PnotE  | 6  | 1.00 | 5  | 1.00 | 3  | 1.00 | 5  | 1.00 | 6  | 1.00 |
| Base | Yes | ST | PvIvE  | 26 | 0.65 | 17 | 0.71 | 15 | 0.73 | 14 | 0.79 | 17 | 0.59 |
| Base | Yes | ST | PvIwet | 10 | 0.50 | 14 | 0.71 | 4  | 1.00 | 7  | 0.57 | 10 | 0.50 |
| Base | Yes | ST | PvNP   | 26 | 0.85 | 17 | 0.76 | 15 | 1.00 | 14 | 0.79 | 17 | 0.76 |
| GIS  | No  | RF | EnotP  | 12 | 1.00 | 3  | 1.00 | 5  | 1.00 | 5  | 1.00 | 4  | 1.00 |
| GIS  | No  | RF | EvIdry | 14 | 0.64 | 3  | 1.00 | 10 | 0.50 | 7  | 0.86 | 7  | 0.71 |
| GIS  | No  | RF | EvALI  | 25 | 0.84 | 17 | 1.00 | 14 | 0.64 | 14 | 0.93 | 17 | 0.76 |
| GIS  | No  | RF | PnotE  | 5  | 1.00 | 5  | 1.00 | 3  | 1.00 | 5  | 1.00 | 6  | 0.83 |
| GIS  | No  | RF | PvIvE  | 25 | 0.68 | 17 | 0.59 | 14 | 0.50 | 14 | 0.93 | 17 | 0.47 |
| GIS  | No  | RF | PvIwet | 9  | 0.67 | 14 | 0.50 | 4  | 0.50 | 7  | 1.00 | 10 | 0.30 |
| GIS  | No  | RF | PvNP   | 25 | 0.84 | 17 | 0.59 | 14 | 0.86 | 14 | 1.00 | 17 | 0.65 |
| GIS  | No  | ST | EnotP  | 12 | 1.00 | 3  | 0.67 | 5  | 0.80 | 5  | 1.00 | 4  | 0.75 |



|     |     |    |        |    |      |    |      |    |      |    |      |    |      |
|-----|-----|----|--------|----|------|----|------|----|------|----|------|----|------|
| GIS | No  | ST | Evldry | 14 | 0.71 | 3  | 0.67 | 10 | 0.70 | 7  | 0.86 | 7  | 0.57 |
| GIS | No  | ST | EvALI  | 25 | 0.80 | 17 | 0.94 | 14 | 0.79 | 14 | 0.93 | 17 | 0.82 |
| GIS | No  | ST | PnotE  | 5  | 1.00 | 5  | 1.00 | 3  | 1.00 | 5  | 1.00 | 6  | 1.00 |
| GIS | No  | ST | PvlvE  | 25 | 0.72 | 17 | 0.71 | 14 | 0.64 | 14 | 0.93 | 17 | 0.71 |
| GIS | No  | ST | Pvlwet | 9  | 0.67 | 14 | 0.71 | 4  | 0.50 | 7  | 1.00 | 10 | 0.80 |
| GIS | No  | ST | PvNP   | 25 | 0.92 | 17 | 0.71 | 14 | 0.79 | 14 | 1.00 | 17 | 0.82 |
| GIS | Yes | RF | EnotP  | 12 | 0.92 | 3  | 1.00 | 5  | 1.00 | 5  | 1.00 | 4  | 1.00 |
| GIS | Yes | RF | Evldry | 14 | 0.64 | 3  | 1.00 | 10 | 0.20 | 7  | 0.71 | 7  | 0.71 |
| GIS | Yes | RF | EvALI  | 25 | 0.84 | 17 | 0.94 | 14 | 0.43 | 14 | 0.86 | 17 | 0.76 |
| GIS | Yes | RF | PnotE  | 5  | 1.00 | 5  | 1.00 | 3  | 1.00 | 5  | 1.00 | 6  | 0.83 |
| GIS | Yes | RF | PvlvE  | 25 | 0.72 | 17 | 0.59 | 14 | 0.29 | 14 | 0.86 | 17 | 0.35 |
| GIS | Yes | RF | Pvlwet | 9  | 0.78 | 14 | 0.50 | 4  | 0.50 | 7  | 1.00 | 10 | 0.10 |
| GIS | Yes | RF | PvNP   | 25 | 0.84 | 17 | 0.65 | 14 | 0.86 | 14 | 1.00 | 17 | 0.53 |
| GIS | Yes | ST | EnotP  | 12 | 1.00 | 3  | 1.00 | 5  | 1.00 | 5  | 1.00 | 4  | 1.00 |
| GIS | Yes | ST | Evldry | 14 | 0.64 | 3  | 1.00 | 10 | 0.50 | 7  | 0.86 | 7  | 0.71 |
| GIS | Yes | ST | EvALI  | 25 | 0.80 | 17 | 1.00 | 14 | 0.64 | 14 | 0.93 | 17 | 0.82 |
| GIS | Yes | ST | PnotE  | 5  | 1.00 | 5  | 1.00 | 3  | 1.00 | 5  | 1.00 | 6  | 1.00 |
| GIS | Yes | ST | PvlvE  | 25 | 0.72 | 17 | 0.71 | 14 | 0.64 | 14 | 0.79 | 17 | 0.65 |
| GIS | Yes | ST | Pvlwet | 9  | 0.89 | 14 | 0.64 | 4  | 1.00 | 7  | 0.71 | 10 | 0.60 |
| GIS | Yes | ST | PvNP   | 25 | 0.92 | 17 | 0.71 | 14 | 1.00 | 14 | 0.86 | 17 | 0.82 |
| H2O | No  | RF | EnotP  | 12 | 0.92 | 3  | 1.00 | 6  | 1.00 | 5  | 1.00 | 4  | 1.00 |
| H2O | No  | RF | Evldry | 14 | 0.71 | 3  | 1.00 | 11 | 0.55 | 7  | 0.71 | 7  | 0.57 |
| H2O | No  | RF | EvALI  | 26 | 0.81 | 17 | 1.00 | 15 | 0.67 | 14 | 0.86 | 17 | 0.82 |
| H2O | No  | RF | PnotE  | 6  | 1.00 | 5  | 1.00 | 3  | 1.00 | 5  | 1.00 | 6  | 1.00 |
| H2O | No  | RF | PvlvE  | 26 | 0.69 | 17 | 0.53 | 15 | 0.53 | 14 | 0.71 | 17 | 0.53 |
| H2O | No  | RF | Pvlwet | 10 | 0.80 | 14 | 0.43 | 4  | 0.50 | 7  | 0.71 | 10 | 0.50 |
| H2O | No  | RF | PvNP   | 26 | 0.85 | 17 | 0.53 | 15 | 0.87 | 14 | 0.86 | 17 | 0.71 |
| H2O | No  | ST | EnotP  | 12 | 0.92 | 3  | 1.00 | 6  | 1.00 | 5  | 1.00 | 4  | 1.00 |
| H2O | No  | ST | Evldry | 14 | 0.64 | 3  | 0.67 | 11 | 0.82 | 7  | 1.00 | 7  | 0.71 |
| H2O | No  | ST | EvALI  | 26 | 0.77 | 17 | 0.94 | 15 | 0.87 | 14 | 1.00 | 17 | 0.88 |
| H2O | No  | ST | PnotE  | 6  | 1.00 | 5  | 1.00 | 3  | 1.00 | 5  | 1.00 | 6  | 1.00 |
| H2O | No  | ST | PvlvE  | 26 | 0.69 | 17 | 0.65 | 15 | 0.87 | 14 | 0.93 | 17 | 0.65 |

|           |     |    |        |    |      |    |      |    |      |    |      |    |      |
|-----------|-----|----|--------|----|------|----|------|----|------|----|------|----|------|
| H2O       | No  | ST | Pvlwet | 10 | 0.90 | 14 | 0.64 | 4  | 1.00 | 7  | 0.86 | 10 | 0.60 |
| H2O       | No  | ST | PvNP   | 26 | 0.88 | 17 | 0.71 | 15 | 1.00 | 14 | 0.93 | 17 | 0.76 |
| H2O       | Yes | RF | EnotP  | 12 | 1.00 | 3  | 1.00 | 6  | 1.00 | 5  | 1.00 | 4  | 1.00 |
| H2O       | Yes | RF | Evidry | 14 | 0.64 | 3  | 1.00 | 11 | 0.55 | 7  | 0.71 | 7  | 0.57 |
| H2O       | Yes | RF | EvALI  | 26 | 0.73 | 17 | 1.00 | 15 | 0.67 | 14 | 0.86 | 17 | 0.82 |
| H2O       | Yes | RF | PnotE  | 6  | 1.00 | 5  | 1.00 | 3  | 1.00 | 5  | 1.00 | 6  | 1.00 |
| H2O       | Yes | RF | PvlvE  | 26 | 0.65 | 17 | 0.65 | 15 | 0.53 | 14 | 0.71 | 17 | 0.53 |
| H2O       | Yes | RF | Pvlwet | 10 | 0.80 | 14 | 0.57 | 4  | 0.50 | 7  | 0.71 | 10 | 0.50 |
| H2O       | Yes | RF | PvNP   | 26 | 0.92 | 17 | 0.65 | 15 | 0.87 | 14 | 0.86 | 17 | 0.71 |
| H2O       | Yes | ST | EnotP  | 12 | 1.00 | 3  | 1.00 | 6  | 1.00 | 5  | 1.00 | 4  | 1.00 |
| H2O       | Yes | ST | Evidry | 14 | 0.93 | 3  | 1.00 | 11 | 0.73 | 7  | 1.00 | 7  | 0.57 |
| H2O       | Yes | ST | EvALI  | 26 | 0.88 | 17 | 1.00 | 15 | 0.80 | 14 | 1.00 | 17 | 0.82 |
| H2O       | Yes | ST | PnotE  | 6  | 1.00 | 5  | 1.00 | 3  | 1.00 | 5  | 1.00 | 6  | 1.00 |
| H2O       | Yes | ST | PvlvE  | 26 | 0.81 | 17 | 0.71 | 15 | 0.73 | 14 | 0.93 | 17 | 0.59 |
| H2O       | Yes | ST | Pvlwet | 10 | 0.80 | 14 | 0.64 | 4  | 0.75 | 7  | 0.86 | 10 | 0.60 |
| H2O       | Yes | ST | PvNP   | 26 | 0.92 | 17 | 0.71 | 15 | 0.93 | 14 | 0.93 | 17 | 0.76 |
| H2O + GIS | No  | RF | EnotP  | 12 | 1.00 | 3  | 1.00 | 5  | 1.00 | 5  | 1.00 | 4  | 1.00 |
| H2O + GIS | No  | RF | Evidry | 14 | 0.64 | 3  | 1.00 | 10 | 0.60 | 7  | 0.71 | 7  | 0.57 |
| H2O + GIS | No  | RF | EvALI  | 25 | 0.76 | 17 | 1.00 | 14 | 0.71 | 14 | 0.86 | 17 | 0.82 |
| H2O + GIS | No  | RF | PnotE  | 5  | 1.00 | 5  | 1.00 | 3  | 1.00 | 5  | 1.00 | 6  | 1.00 |
| H2O + GIS | No  | RF | PvlvE  | 25 | 0.60 | 17 | 0.65 | 14 | 0.57 | 14 | 0.86 | 17 | 0.47 |
| H2O + GIS | No  | RF | Pvlwet | 9  | 0.67 | 14 | 0.57 | 4  | 0.50 | 7  | 1.00 | 10 | 0.40 |
| H2O + GIS | No  | RF | PvNP   | 25 | 0.84 | 17 | 0.65 | 14 | 0.86 | 14 | 1.00 | 17 | 0.65 |
| H2O + GIS | No  | ST | EnotP  | 12 | 0.92 | 3  | 1.00 | 5  | 1.00 | 5  | 1.00 | 4  | 1.00 |
| H2O + GIS | No  | ST | Evidry | 14 | 0.86 | 3  | 0.67 | 10 | 0.80 | 7  | 1.00 | 7  | 0.57 |
| H2O + GIS | No  | ST | EvALI  | 25 | 0.84 | 17 | 0.94 | 14 | 0.86 | 14 | 1.00 | 17 | 0.82 |
| H2O + GIS | No  | ST | PnotE  | 5  | 1.00 | 5  | 1.00 | 3  | 1.00 | 5  | 1.00 | 6  | 1.00 |
| H2O + GIS | No  | ST | PvlvE  | 25 | 0.72 | 17 | 0.71 | 14 | 0.71 | 14 | 0.93 | 17 | 0.59 |
| H2O + GIS | No  | ST | Pvlwet | 9  | 0.67 | 14 | 0.71 | 4  | 0.50 | 7  | 0.86 | 10 | 0.60 |
| H2O + GIS | No  | ST | PvNP   | 25 | 0.84 | 17 | 0.76 | 14 | 0.86 | 14 | 0.93 | 17 | 0.76 |
| H2O + GIS | Yes | RF | EnotP  | 12 | 1.00 | 3  | 1.00 | 5  | 1.00 | 5  | 1.00 | 4  | 1.00 |
| H2O + GIS | Yes | RF | Evidry | 14 | 0.71 | 3  | 1.00 | 10 | 0.60 | 7  | 0.71 | 7  | 0.71 |

|           |     |    |        |    |      |    |      |    |      |    |      |    |      |
|-----------|-----|----|--------|----|------|----|------|----|------|----|------|----|------|
| H2O + GIS | Yes | RF | EvALI  | 25 | 0.84 | 17 | 1.00 | 14 | 0.71 | 14 | 0.86 | 17 | 0.88 |
| H2O + GIS | Yes | RF | PnotE  | 5  | 1.00 | 5  | 1.00 | 3  | 1.00 | 5  | 1.00 | 6  | 1.00 |
| H2O + GIS | Yes | RF | PvlvE  | 25 | 0.68 | 17 | 0.47 | 14 | 0.64 | 14 | 0.64 | 17 | 0.59 |
| H2O + GIS | Yes | RF | Pvlwet | 9  | 0.67 | 14 | 0.36 | 4  | 0.75 | 7  | 0.57 | 10 | 0.50 |
| H2O + GIS | Yes | RF | PvNP   | 25 | 0.84 | 17 | 0.47 | 14 | 0.93 | 14 | 0.79 | 17 | 0.71 |
| H2O + GIS | Yes | ST | EnotP  | 12 | 0.75 | 3  | 1.00 | 5  | 1.00 | 5  | 1.00 | 4  | 1.00 |
| H2O + GIS | Yes | ST | EvlDry | 14 | 0.79 | 3  | 1.00 | 10 | 0.70 | 7  | 0.43 | 7  | 0.57 |
| H2O + GIS | Yes | ST | EvALI  | 25 | 0.80 | 17 | 1.00 | 14 | 0.86 | 14 | 0.71 | 17 | 0.82 |
| H2O + GIS | Yes | ST | PnotE  | 5  | 1.00 | 5  | 1.00 | 3  | 1.00 | 5  | 1.00 | 6  | 1.00 |
| H2O + GIS | Yes | ST | PvlvE  | 25 | 0.68 | 17 | 0.65 | 14 | 0.71 | 14 | 0.64 | 17 | 0.71 |
| H2O + GIS | Yes | ST | Pvlwet | 9  | 0.67 | 14 | 0.57 | 4  | 0.75 | 7  | 0.86 | 10 | 0.80 |
| H2O + GIS | Yes | ST | PvNP   | 25 | 0.76 | 17 | 0.65 | 14 | 0.86 | 14 | 0.93 | 17 | 0.88 |

## File S5. Focus-area studies

Focus area studies were conducted in two watersheds, one in California (i.e., the Santa Margarita River) and another in Arizona (i.e., the Hassayampa River). Each focus area study was led by practitioners with different backgrounds, but were likely to need to generate streamflow duration information as part of their job duties. The California focus area study was led by a private consultant with experience in wetland delineations and related jurisdictional matters, and the Arizona focus area study was led by an environmental scientist with the state regulatory agency. Each practitioner was provided with a day of training in the same protocols described in Supplement , after which they collected data from each reach during multiple repeated visits throughout the year.

Reaches within each focus area were located along a longitudinal gradient from headwaters to mainstems, without prior knowledge of flow duration; Stream Temperature, Intermittence and Conductivity loggers (STIC loggers, [36]) were installed at each watershed reach to enable their eventual classification. Data from these studies were evaluated using the beta SDAM AW, and results were presented to each practitioner. The practitioner then provided feedback on the resulting classifications, as well as on their experience using the protocol.

### File S5.1. California focus-area study

Five reaches were selected in Murrieta Creek (a tributary of the Santa Margarita River in southern California), and one reach was selected in the Santa Margarita River just below the confluence. Each reach was visited on three occasions: the first in the peak of the dry season of 2019, the second a month after the end of the rainy season in 2020. The final visit occurred in the subsequent dry season in late summer of 2020. All six reaches were classified as *At least intermittent* at least once, and several were classified as perennial on one or more occasions. The practitioner conducting this focus area study determined that most classifications were correct, except for two intermittent reaches that were classified as perennial during the second visit, and one reach that was classified as *Need more information* on the first visit. The reach classified as *Need more information* was dominated by sandy substrate and is subject to frequent disturbance by off road vehicles. Thus, algal and invertebrate indicators were less able to persist into the dry season at this reach, compared to upstream reaches with more stable substrate and less active recreation. Hydrophytic plants were more robust to these disturbances and were evident at every reach-visit.

The practitioner believed that the focus area study provided new insight into his understanding of the watershed by highlighting the ability of biological indicators to integrate hydrologic information. Although he initially expected the upper-most reach in the study to be ephemeral based on its small watershed size and geomorphic characteristics, he thought that the presence of biological indicators was compelling evidence that it had intermittent flow duration.

The practitioner conducting this focus area study had a background in physical sciences and botany, but less experience with entomology. He felt that sampling and identifying aquatic invertebrates was a challenge, and he may have overlooked EPT taxa that were likely present at the lower two reaches, which are truly perennial. Deep water at those reaches—particularly during the second visit—may have further complicated sampling of aquatic invertebrates. He believed that adjustments we made to the protocol (specifically, dropping family-level identifications and replacing them with presence/absence of EPT taxa) would make the method more accessible and easier to use.

Variability in classifications and indicator measurements in the California focus area study. The total stream-length is approximately 20 km. BMI: Aquatic invertebrates. EPT: Ephemeroptera, Plecoptera, and Trichoptera. Refer to **Error! Reference source not found.** for information on indicator levels.

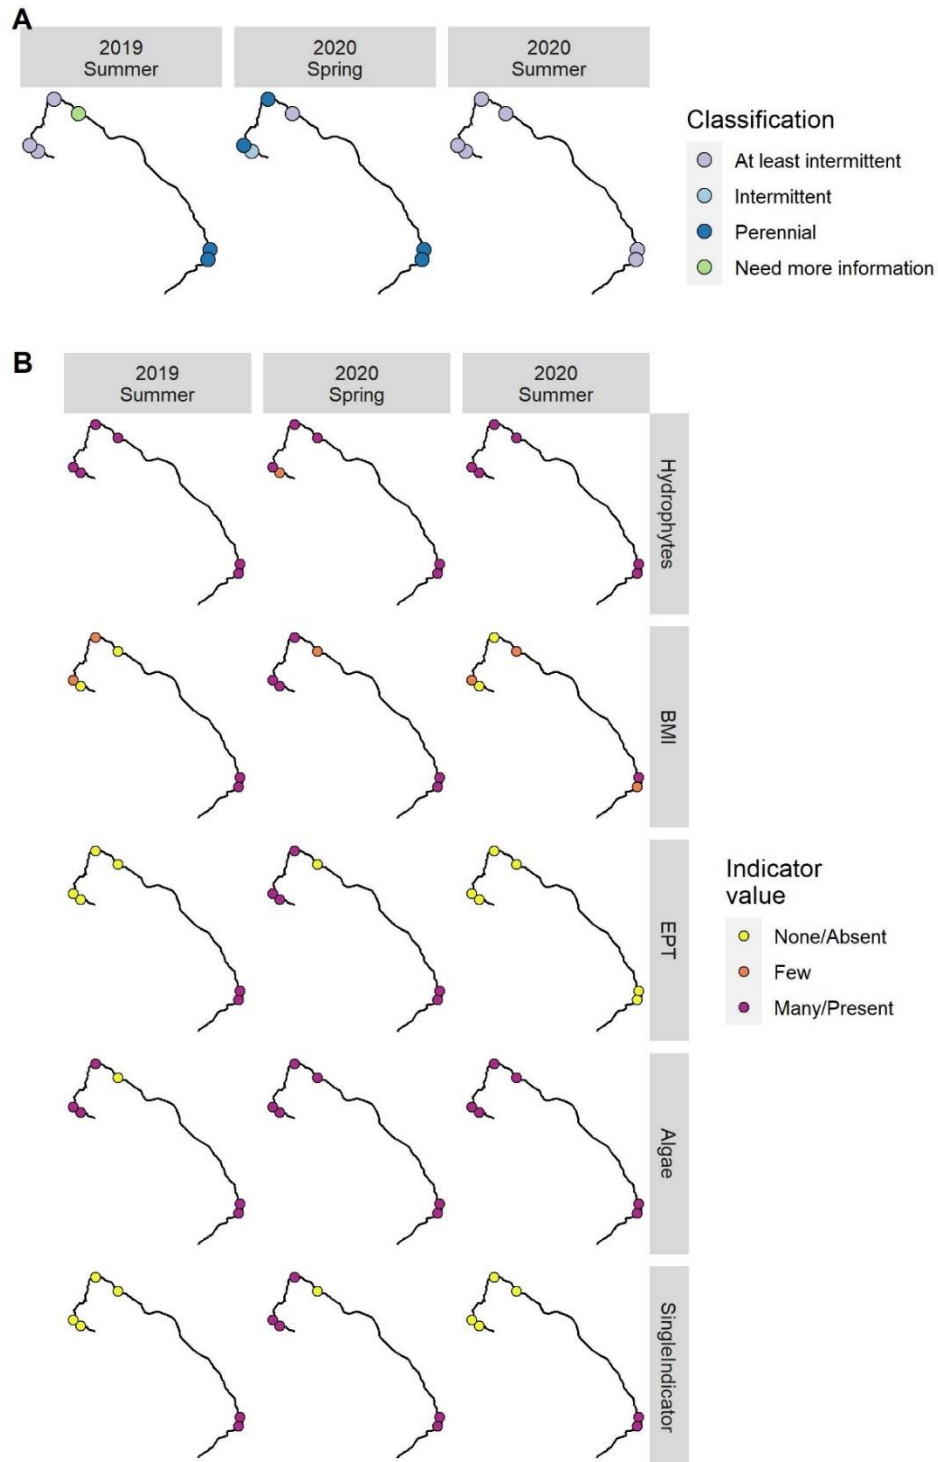

#### File S5.2. Arizona focus-area study

Ten reaches were selected along the Hassayampa River, a large river to the west of Phoenix. Reaches ranged from the headwaters in the Bradshaw Mountains to a few kilometers north of its confluence with the Gila River. Streamflow duration information was needed at these reaches for a number of pending management decisions related to the application of water quality standards and remediation of mining impacts. A total of 10 reaches were visited on at least two occasions between 2019 and 2021. Reaches in the upper part of the river were consistently classified as *Perennial* or *At least intermittent*, whereas classifications in the lowest portions were less consistent. Most of the variability was attributable to the aquatic invertebrate indicators, in contrast with algae and hydrophytic plant species. Classifications resulted in *Need more information* four times: twice at reaches where other assessments resulted in more conclusive classifications, and twice at the same reach.

The practitioner believed that the classifications produced by the SDAM were correct, although the frequency of *Need more information* classifications was higher than she expected. Therefore, guidance on interpreting results in those situations would be helpful. Although this practitioner was experienced with identifying aquatic invertebrates, she believed that field-based taxonomic identifications may be prone to errors and demand more training than she would be able to provide her staff.

Variability in classifications and indicator measurements in the Arizona focus area study. The total stream-length is approximately 100 km. BMI: Aquatic invertebrates. EPT: Ephemeroptera, Plecoptera, and Trichoptera. Refer to **Error! Reference source not found.** for information on indicator levels.

**A**

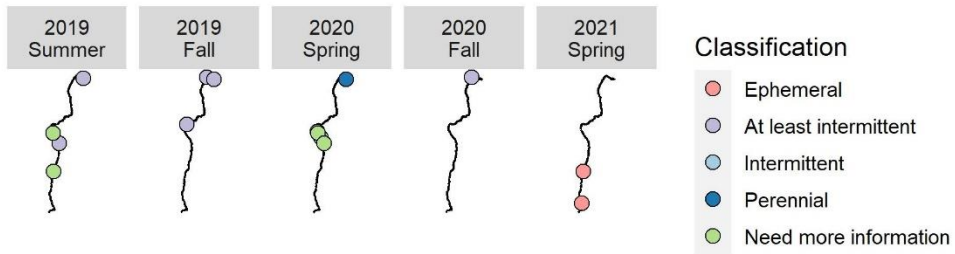

**B**

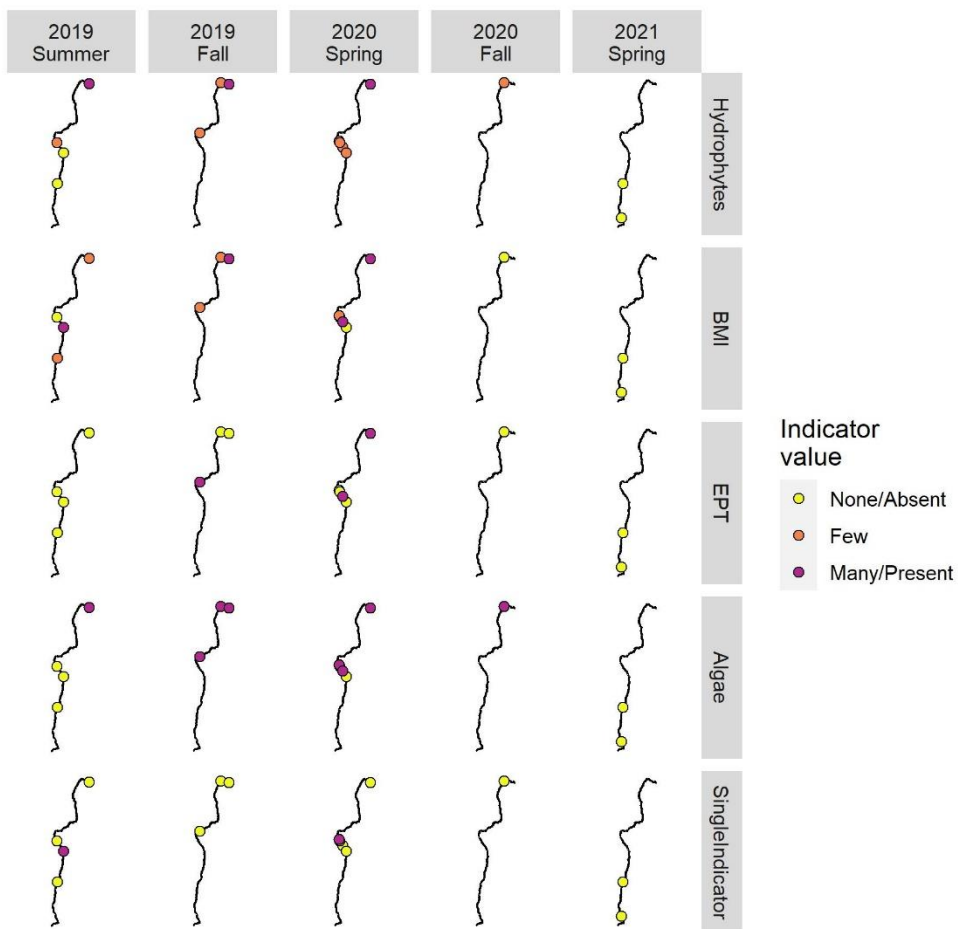

Supplement: s1 [file s1]
